# Supplementary material
Source: MDPI journal article supplement (https://www.mdpi.com/2071-1050/16/5/2050)
Supplement: s1 [file s1]

# Active Ingredients season/hectare

| Active Ingredients season/hectare |                                 |                                                                                                                                 |                                                            |                        |                  |           |                  |         |                  |         |                  |         |                  |         |                  |
|-----------------------------------|---------------------------------|---------------------------------------------------------------------------------------------------------------------------------|------------------------------------------------------------|------------------------|------------------|-----------|------------------|---------|------------------|---------|------------------|---------|------------------|---------|------------------|
| Descriptive                       |                                 |                                                                                                                                 |                                                            | Seasons                |                  |           |                  |         |                  |         |                  |         |                  |         | Series           |
| Aplicações                        | Products - label (manufacturer) | Active ingredient                                                                                                               | Unit                                                       | Season Average hectare | 15-16            |           | 16-17            |         | 17-18            |         | 18-19            |         | 19-20            |         | 20-21            |
|                                   |                                 |                                                                                                                                 |                                                            |                        | Quantity applied |           | Quantity applied |         | Quantity applied |         | Quantity applied |         | Quantity applied |         | Quantity applied |
|                                   |                                 |                                                                                                                                 |                                                            |                        | Total            | p/Hectare | Total            | Hectare | Total            | Hectare | Total            | Hectare | Total            | Hectare | Total            |
| Herbicides                        | ETIZOL (NUFARM)                 | Amitrole (21%) + Ammonium Thiocyanate (19%)                                                                                     | liter                                                      | 0,86                   | 16,00            | 5,17      |                  |         |                  |         |                  |         |                  |         |                  |
|                                   | MARQUI (SELECTIS)               | Glyphosate (isopropylammonium salt) (36%)                                                                                       | liter                                                      | 3,71                   | 16,00            | 5,17      | 16,00            | 5,17    |                  |         | 29,00            | 9,36    |                  |         | 7,90             |
|                                   | CHIKARA (BELCHIM)               | Flazassulfuron (25%)                                                                                                            | kg                                                         | 0,04                   |                  |           | 0,80             | 0,26    |                  |         |                  |         |                  |         |                  |
|                                   | ORFEU (SELECTIS)                | Flazassulfuron (25%)                                                                                                            | kg                                                         | 0,07                   |                  |           |                  |         | 0,80             | 0,26    | 0,48             | 0,15    |                  |         |                  |
|                                   | PREMIER 45 ENVISION (CHEMINOVA) | Glyphosate (isopropylammonium salt) (45%)                                                                                       | liter                                                      | 0,03                   |                  |           |                  |         | 0,50             | 0,16    |                  |         |                  |         |                  |
|                                   | RUMBO EXTRA (IQV)               | Glyphosate (isopropylammonium salt) (31,2%)                                                                                     | liter                                                      | 0,65                   |                  |           |                  |         | 12,00            | 3,87    |                  |         |                  |         |                  |
|                                   | BUGGY NEO (SIPCAM)              | Glyphosate (isopropylammonium salt) (31,2%)                                                                                     | liter                                                      | 0,97                   |                  |           |                  |         |                  |         |                  |         | 18,00            | 5,812   |                  |
|                                   | KATANA (BELCHIM)                | Flazassulfuron (25%)                                                                                                            | kg                                                         | 0,09                   |                  |           |                  |         |                  |         |                  |         | 0,80             | 0,258   | 0,79             |
| Fertilisation                     | QUIZOPE (SELECTIS)              | Quizalofop-P-Ethyl (12%)                                                                                                        | liter                                                      | 0,27                   |                  |           |                  |         |                  |         |                  |         |                  |         | 4,94             |
|                                   | YARA MILA ACTIVA 20-7-10 (YARA) | N-20% (Nitrate 9,4% + Ammonium 10,6%) / P <sub>2</sub> O <sub>5</sub> -7% / K <sub>2</sub> O-10% / Mg-3% / SO <sub>3</sub> -10% | kg                                                         | 0,32                   |                  |           |                  |         |                  |         | 6,00             | 1,94    |                  |         |                  |
|                                   | TECNIFOL 3-8-11 (ADP)           | N-3% / P <sub>2</sub> O <sub>5</sub> 8% / K <sub>2</sub> O 11%                                                                  | liter                                                      | 0,11                   |                  |           |                  |         |                  |         | 2,00             | 0,65    |                  |         |                  |
|                                   | NITROLUSAL 20,5% (ADP)          | N-20,5% (Nitric Nitrogen 10,25% + Ammoniacal Nitrogen 10,25%) / Limestone (7%) (CaO - Calcium Oxide)                            | kg                                                         | 0,16                   |                  |           |                  |         |                  |         |                  |         | 3,00             | 0,969   |                  |
| Plant Protection                  | CADUBAL 15-15-15 (CADUBAL)      | N-15% / P-15% / K-15%                                                                                                           | kg                                                         | 0,97                   |                  |           |                  |         |                  |         |                  |         |                  |         | 18,00            |
|                                   | FOLPAXIL AZUL (SELECTIS)        | Folpete (40%) e Metalaxil (10%)                                                                                                 | kg                                                         | 4,39                   | 24,78            | 8,00      | 16,26            | 5,25    | 8,26             | 2,67    | 16,52            | 5,33    |                  |         | 15,80            |
|                                   | CIMORFARM C (NUFARM)            | Cymoxanil (4%) + Copper (40%) (Copper Oxycloride)                                                                               | kg                                                         | 1,29                   |                  |           | 24,00            | 7,75    |                  |         |                  |         |                  |         |                  |
|                                   | CIMONIL C (SELECTIS)            | Cymoxanil (4%) + Copper Oxycloride (40%)                                                                                        | kg                                                         | 3,52                   | 17,80            | 5,75      |                  |         | 12,00            | 3,87    | 12,00            | 3,87    | 11,80            | 3,810   | 11,85            |
|                                   | CIMORAME M (SELECTIS)           | Cymoxanil (4%) + Mancozeb (46,5%)                                                                                               | kg                                                         | 1,93                   |                  |           |                  |         | 24,00            | 7,75    |                  |         | 11,80            | 3,810   |                  |
|                                   | MELODY COBRE (BAYER)            | Copper (Oxychloride) (40%) + Iprovalicarb (8%)                                                                                  | kg                                                         | 0,32                   |                  |           |                  |         |                  |         | 6,00             | 1,94    |                  |         |                  |
|                                   | MELODY (BAYER)                  | Folpet (56%) + Iprovalicarb (9%)                                                                                                | kg                                                         | 0,83                   |                  |           |                  |         |                  |         | 5,20             | 1,68    | 10,20            | 3,293   |                  |
|                                   | TRETACOL F AZUL (BELCHIM)       | Benalaxyl (8%) + Folpet (44%)                                                                                                   | kg                                                         | 0,01                   | 0,20             | 0,06      |                  |         |                  |         |                  |         |                  |         |                  |
|                                   | STADIO F (NUFARM)               | Benalaxyl-M (3,75%) + Folpet (48%)                                                                                              | kg                                                         | 1,08                   |                  |           |                  |         | 12,00            | 3,87    |                  |         | 8,00             | 2,583   |                  |
|                                   | BELVITIS (SELECTIS)             | Dimethomorph (6%) + Folpet (25%) + Fosetyl-Aluminum (50%)                                                                       | kg                                                         | 0,64                   |                  |           |                  |         |                  |         |                  |         | 11,80            | 3,810   |                  |
|                                   | JAVA (BELCHIM)                  | Folpet (48%) + Vaniphenalate (6%)                                                                                               | kg                                                         | 0,43                   |                  |           |                  |         |                  |         |                  |         |                  |         | 7,90             |
|                                   | SENADOR F (SELECTIS)            | Dimethomorph (11,3%) + Folpet (60%)                                                                                             | kg                                                         | 0,34                   |                  |           |                  |         |                  |         |                  |         |                  |         | 6,32             |
|                                   | Mildium/ Black Rott             | VALBON (SIPCAM)                                                                                                                 | Benthiavalicarb (Isopropyl ester) (1,75%) + Mancozeb (70%) | kg                     | 0,44             |           |                  |         |                  |         | 8,26             | 2,67    |                  |         |                  |
|                                   | Oidium/ Black Rott              | ARIOSTA (SELECTIS)                                                                                                              | Kresoxim-methyl (25%) + Penconazole (8,75%)                | kg                     | 0,77             |           | 3,00             | 0,97    | 4,50             | 1,45    | 3,60             | 1,16    | 1,58             | 0,510   | 1,58             |
|                                   |                                 | FLINT MAX (BAYER)                                                                                                               | Tebuconazole (50%) + Trifloxystrobin (25%)                 | kg                     | 0,06             |           |                  |         |                  |         |                  |         | 0,63             | 0,203   | 0,47             |
|                                   | Oidium/ Black Rott              | PENCOL (SELECTIS)                                                                                                               | Penconazole (10%)                                          | liter                  | 0,03             | 0,50      |                  | 0,16    |                  |         |                  |         |                  |         |                  |
|                                   |                                 | KARATHAME STAR (LUSOSEM-DOW)                                                                                                    | Meptildinocap (35,7%)                                      | liter                  | 0,03             | 0,50      |                  | 0,16    |                  |         |                  |         |                  |         |                  |
|                                   |                                 | ALASKA Micro (SELECTIS)                                                                                                         | Sulfur (80%)                                               | kg                     | 9,55             | 49,50     |                  | 15,98   | 16,50            | 5,33    | 33,00            | 10,66   | 39,50            | 12,754  | 39,00            |
|                                   |                                 | FLOR D'OURO (SELECTIS)                                                                                                          | Sulphur (98,5%)                                            | kg                     | 19,75            | 45,00     |                  | 14,53   | 60,00            | 19,37   | 45,00            | 14,53   | 95,00            | 30,674  | 77,00            |
|                                   |                                 | COSAN WDG (NUFARM)                                                                                                              | Sulphur (80%)                                              | kg                     | 0,39             |           | 7,20             | 2,32    |                  |         |                  |         |                  |         |                  |
|                                   |                                 | COLLIS (SAPEC)                                                                                                                  | Boscalid (18,2%) + Kresoxim-methyl (9,1%)                  | kg                     | 0,20             |           |                  |         |                  |         |                  |         | 3,16             | 1,020   | 0,59             |
|                                   |                                 | AZUFEGA (AUF)                                                                                                                   | Sulphur (98,5%)                                            | kg                     | 3,34             |           |                  |         |                  |         |                  |         |                  |         | 62,00            |
|                                   |                                 | SERCADIS 30 SC (BASF)                                                                                                           | Fluxaproxad (26,5%)                                        | liter                  | 0,05             |           |                  |         |                  |         |                  |         |                  |         | 1,00             |
|                                   | Gray Rott                       | CARDINAL (SELECTIS)                                                                                                             | Ciprodinil (50%)                                           | kg                     | 0,01             |           |                  |         |                  |         |                  |         |                  |         | 0,23             |
|                                   | Insecticide                     | KAISO SORBIE (NUFARM)                                                                                                           | Lambda-Cyhalotrin (5%)                                     | kg                     | 0,03             | 0,30      |                  | 0,10    |                  |         | 0,30             | 0,10    |                  |         |                  |
|                                   |                                 | CYTHRIN 10 EC                                                                                                                   | Cipermethrin (10,9%)                                       | liter                  | 0,16             |           |                  |         |                  |         | 1,00             | 0,32    | 1,00             | 0,323   | 0,99             |
|                                   |                                 | CONDOR (SELECTIS)                                                                                                               | Imidacloprid (17,8%)                                       | liter                  | 0,05             | 0,50      | 0,15             | 0,05    | 0,30             | 0,10    |                  |         |                  |         | 0,32             |
