# Supplementary material
Source: MDPI journal article supplement (https://www.mdpi.com/2071-1050/16/5/2050)
Supplement: s1 [file s1]

Registration Grid: Interventions and operations in Viticultural Farms from 'Prunning to Harvest'

Identification and characterisation

|                   |                   |                      |  |
|-------------------|-------------------|----------------------|--|
| Farm              | Production Method |                      |  |
|                   | Total area        |                      |  |
|                   | Vine area         |                      |  |
|                   | Edaphoclimatic    | Localisation         |  |
|                   |                   | Altitud              |  |
|                   |                   | Pending (%)          |  |
|                   |                   | Type of stone        |  |
|                   |                   | Elementos grosseiros |  |
|                   |                   | Solar Exposition     |  |
|                   |                   | Shelter              |  |
| Ownership         |                   |                      |  |
| Ativity beggining |                   |                      |  |

|           |                |  |
|-----------|----------------|--|
| Culturais | Yield          |  |
|           | Type of vines  |  |
|           | Plants density |  |
|           | Vines trelling |  |
|           | Age of vine    |  |

|        |                      |  |
|--------|----------------------|--|
| Others | Terroir organisation |  |
|        | Porta-Excertos       |  |
|        | Sistema de rega      |  |
|        | Nº of grape vines    |  |
|        | Grapes produced (kg) |  |

Operations data - campaign year /

| Interventions / Operations  |                                 | Slope cleaning | Digging | Prunning | Vines up | Replanting | Irrigation |     | Fertilization | Herbicide |     | Grafting | Trellis repair | Digging | Tying shoots |   |   |     | Dedudding | Weeding |     | Phytofarmaceuticals aplication |   |   |   |     | Shoots removal |   | Plowing soil | Technical controls |     | Pre-Harvesting | Harvesting | Land improvement |     | Others/ Observations |
|-----------------------------|---------------------------------|----------------|---------|----------|----------|------------|------------|-----|---------------|-----------|-----|----------|----------------|---------|--------------|---|---|-----|-----------|---------|-----|--------------------------------|---|---|---|-----|----------------|---|--------------|--------------------|-----|----------------|------------|------------------|-----|----------------------|
| Operations                  |                                 | Date           |         |          |          |            | 1          | ... |               | 1         | ... |          |                |         | 1            | 2 | 3 | ... |           | 1       | ... | 1                              | 2 | 3 | 4 | ... | 1              | 2 |              | 1                  | ... |                |            | 1                | ... |                      |
| Traction ressources (hours) | Human                           |                |         |          |          |            |            |     |               |           |     |          |                |         |              |   |   |     |           |         |     |                                |   |   |   |     |                |   |              |                    |     |                |            |                  |     |                      |
|                             | Mechanic                        |                |         |          |          |            |            |     |               |           |     |          |                |         |              |   |   |     |           |         |     |                                |   |   |   |     |                |   |              |                    |     |                |            |                  |     |                      |
|                             | Animal                          |                |         |          |          |            |            |     |               |           |     |          |                |         |              |   |   |     |           |         |     |                                |   |   |   |     |                |   |              |                    |     |                |            |                  |     |                      |
| Mechanic traction (hours)   | Human                           |                |         |          |          |            |            |     |               |           |     |          |                |         |              |   |   |     |           |         |     |                                |   |   |   |     |                |   |              |                    |     |                |            |                  |     |                      |
|                             | Mechanic                        |                |         |          |          |            |            |     |               |           |     |          |                |         |              |   |   |     |           |         |     |                                |   |   |   |     |                |   |              |                    |     |                |            |                  |     |                      |
|                             | Animal                          |                |         |          |          |            |            |     |               |           |     |          |                |         |              |   |   |     |           |         |     |                                |   |   |   |     |                |   |              |                    |     |                |            |                  |     |                      |
| Material (kg)               | Plants                          |                |         |          |          |            |            |     |               |           |     |          |                |         |              |   |   |     |           |         |     |                                |   |   |   |     |                |   |              |                    |     |                |            |                  |     |                      |
|                             | Wood                            |                |         |          |          |            |            |     |               |           |     |          |                |         |              |   |   |     |           |         |     |                                |   |   |   |     |                |   |              |                    |     |                |            |                  |     |                      |
|                             | Natural/Vegetal                 |                |         |          |          |            |            |     |               |           |     |          |                |         |              |   |   |     |           |         |     |                                |   |   |   |     |                |   |              |                    |     |                |            |                  |     |                      |
|                             | Stone                           |                |         |          |          |            |            |     |               |           |     |          |                |         |              |   |   |     |           |         |     |                                |   |   |   |     |                |   |              |                    |     |                |            |                  |     |                      |
|                             | Metalic                         |                |         |          |          |            |            |     |               |           |     |          |                |         |              |   |   |     |           |         |     |                                |   |   |   |     |                |   |              |                    |     |                |            |                  |     |                      |
|                             | Plastic                         |                |         |          |          |            |            |     |               |           |     |          |                |         |              |   |   |     |           |         |     |                                |   |   |   |     |                |   |              |                    |     |                |            |                  |     |                      |
| Produts used (kg)           | Synthetic                       |                |         |          |          |            |            |     |               |           |     |          |                |         |              |   |   |     |           |         |     |                                |   |   |   |     |                |   |              |                    |     |                |            |                  |     |                      |
|                             | Natural                         |                |         |          |          |            |            |     |               |           |     |          |                |         |              |   |   |     |           |         |     |                                |   |   |   |     |                |   |              |                    |     |                |            |                  |     |                      |
|                             | Chemical - Synthetic/ Processed |                |         |          |          |            |            |     |               |           |     |          |                |         |              |   |   |     |           |         |     |                                |   |   |   |     |                |   |              |                    |     |                |            |                  |     |                      |
|                             | Mineral                         |                |         |          |          |            |            |     |               |           |     |          |                |         |              |   |   |     |           |         |     |                                |   |   |   |     |                |   |              |                    |     |                |            |                  |     |                      |
|                             | Activ Principle                 |                |         |          |          |            |            |     |               |           |     |          |                |         |              |   |   |     |           |         |     |                                |   |   |   |     |                |   |              |                    |     |                |            |                  |     |                      |
| Water used (Liters)         | Desease/ Plague/ Nutrition      |                |         |          |          |            |            |     |               |           |     |          |                |         |              |   |   |     |           |         |     |                                |   |   |   |     |                |   |              |                    |     |                |            |                  |     |                      |
|                             | Watering hole                   |                |         |          |          |            |            |     |               |           |     |          |                |         |              |   |   |     |           |         |     |                                |   |   |   |     |                |   |              |                    |     |                |            |                  |     |                      |
|                             | Waterline                       |                |         |          |          |            |            |     |               |           |     |          |                |         |              |   |   |     |           |         |     |                                |   |   |   |     |                |   |              |                    |     |                |            |                  |     |                      |
|                             | Drinkable                       |                |         |          |          |            |            |     |               |           |     |          |                |         |              |   |   |     |           |         |     |                                |   |   |   |     |                |   |              |                    |     |                |            |                  |     |                      |
| Waste (kg)                  | Organic                         |                |         |          |          |            |            |     |               |           |     |          |                |         |              |   |   |     |           |         |     |                                |   |   |   |     |                |   |              |                    |     |                |            |                  |     |                      |
|                             | Consumption                     |                |         |          |          |            |            |     |               |           |     |          |                |         |              |   |   |     |           |         |     |                                |   |   |   |     |                |   |              |                    |     |                |            |                  |     |                      |
|                             | Retur                           |                |         |          |          |            |            |     |               |           |     |          |                |         |              |   |   |     |           |         |     |                                |   |   |   |     |                |   |              |                    |     |                |            |                  |     |                      |
|                             | Recicling                       |                |         |          |          |            |            |     |               |           |     |          |                |         |              |   |   |     |           |         |     |                                |   |   |   |     |                |   |              |                    |     |                |            |                  |     |                      |
