# Supplementary material
Source: MDPI journal article supplement (https://www.mdpi.com/2071-1050/16/5/2050)
Supplement: s1 [file s1]

| Inputs                           |                       |            |            |            |            |            |            |           |          |          |          |                    |
|----------------------------------|-----------------------|------------|------------|------------|------------|------------|------------|-----------|----------|----------|----------|--------------------|
| Flow                             | Categorie             | Unit/ Year | Quantity   |            |            |            |            |           | Stats    |          |          |                    |
|                                  |                       |            | 2015-16    | 2016-17    | 2017-18    | 2018-19    | 2019-20    | 2020-21   | Minimum  | Maximum  | Mean     | Standard Deviation |
| Ammonium nitrate, as N           | Ecolnvent cut-off S   | kg         | -          | -          | -          | 6,1988E-05 | 6,7274E-05 | 2,400E-04 | 6,20E-05 | 2,40E-04 | 1,23E-04 | 1,01E-04           |
| Copper sulfate                   | Ecolnvent cut-off S   | kg         | 6,9000E-04 | 5,6000E-04 | 3,6000E-04 | 3,6000E-04 | 1,5100E-03 | 4,000E-04 | 3,60E-04 | 1,51E-03 | 6,47E-04 | 4,43E-04           |
| Diesel Combustion in tractor     | Others/transformation | kg         | 4,1530E-02 | 1,5960E-02 | 1,8620E-02 | 1,5530E-02 | 3,6390E-02 | 2,462E-02 | 1,55E-02 | 4,15E-02 | 2,54E-02 | 1,11E-02           |
| Folpet                           | Ecolnvent cut-off S   | kg         | 9,7000E-04 | 3,8000E-04 | 6,9000E-04 | 7,8000E-04 | 1,3000E-03 | 1,180E-03 | 3,80E-04 | 1,30E-03 | 8,83E-04 | 3,38E-04           |
| Glyphosate                       | Ecolnvent cut-off S   | kg         | 5,6000E-04 | 3,4000E-04 | 3,0000E-04 | 5,2000E-04 | 5,8000E-04 | 2,400E-04 | 2,40E-04 | 5,80E-04 | 4,23E-04 | 1,47E-04           |
| Magnesium                        | Resource/unspecified  | kg         | -          | -          | -          | 8,8900E-06 | -          | -         | -        | -        | -        | -                  |
| Mancozeb                         | Ecolnvent cut-off S   | kg         | -          | -          | 8,5000E-04 | 2,9000E-04 | 5,7000E-04 | -         | 2,90E-04 | 8,50E-04 | 5,70E-04 | 2,80E-04           |
| Occupation permanent croop, vine | Resource/land         | m2*a       | 3,0069E+00 | 1,8112E+00 | 2,3463E+00 | 1,5302E+00 | 3,2094E+00 | 2,639E-01 | 2,64E-01 | 3,21E+00 | 2,03E+00 | 1,08E+00           |
| Pesticide unspecified            | Ecolnvent cut-off S   | kg         | 9,6000E-04 | 4,5000E-04 | 4,6000E-04 | 3,0000E-04 | 1,1900E-03 | 6,298E-05 | 6,30E-05 | 1,19E-03 | 5,70E-04 | 4,23E-04           |
| Phosphate fertiliser, as P2O5    | Ecolnvent cut-off S   | kg         | -          | -          | -          | 2,8660E-05 | -          | 2,300E-04 | 2,87E-05 | 2,30E-04 | 1,29E-04 | 1,42E-04           |
| Potassium fertiliser, as K2O     | Ecolnvent cut-off S   | kg         | -          | -          | -          | 4,0510E-05 | -          | 2,300E-04 | 4,05E-05 | 2,30E-04 | 1,35E-04 | 1,34E-04           |
| Sulphur                          | Ecolnvent cut-off S   | kg         | 0,00815    | 0,00379    | 0,00436    | 0,00351    | 0,01297    | 0,01433   | 3,51E-03 | 1,43E-02 | 7,85E-03 | 4,81E-03           |

| Outputs                    |                                 |            |            |            |            |            |            |            |          |          |          |                    |
|----------------------------|---------------------------------|------------|------------|------------|------------|------------|------------|------------|----------|----------|----------|--------------------|
| Flow                       | Categorie                       | Unit/ Year | Quantity   |            |            |            |            |            | Stats    |          |          |                    |
|                            |                                 |            | 2015-16    | 2016-17    | 2017-18    | 2018-19    | 2019-20    | 2020-21    | Minimum  | Maximum  | Mean     | Standard Deviation |
| Amitrole                   | Emission to soil                | m2*a       | 3,3000E-04 | -          | -          | -          | -          | -          | -        | -        | -        | -                  |
| Ammonia, as N              | Emission to air                 | kg         | 1,4240E-06 | 8,5772E-07 | 1,1111E-06 | 2,6984E-06 | 3,5440E-06 | 8,5443E-06 | 8,58E-07 | 8,58E-07 | 3,03E-06 | 2,89E-06           |
| Ammonium Thiocyanate       | Emission to soil                | kg         | 3,0000E-04 | -          | -          | -          | -          | -          | 3,00E-04 | 3,00E-04 | 3,00E-04 | -                  |
| Benalaxyl                  | Emission to soil                | kg         | 1,5500E-06 | -          | 3,4090E-05 | -          | 3,1090E-05 | -          | 1,55E-06 | 1,55E-06 | 2,22E-05 | 1,80E-05           |
| Benthiavalicarb            | Emission to soil                | kg         | -          | -          | -          | 7,1400E-06 | -          | -          | -        | -        | -        | -                  |
| Boscalid                   | Emission to soil                | kg         | -          | -          | -          | -          | 5,9600E-05 | 9,1900E-06 | 9,19E-06 | 9,19E-06 | 3,44E-05 | 3,56E-05           |
| Calcium                    | Emission to soil                | kg         | -          | -          | -          | -          | 2,1760E-05 | -          | -        | -        | -        | -                  |
| Copper oxychloride         | Emission to soil                | kg         | -          | -          | -          | -          | -          | 1,5100E-03 | -        | -        | -        | -                  |
| Copper oxychloride sulfate | Emission to soil                | kg         | 6,9000E-04 | 5,6000E-04 | 3,6000E-04 | 3,6000E-04 | 1,5100E-03 | 4,0000E-04 | 3,60E-04 | 3,60E-04 | 6,47E-04 | 4,43E-04           |
| Cymoxanil                  | Emission to soil                | kg         | 6,9130E-05 | 5,6140E-05 | 3,6360E-05 | 2,3720E-05 | 9,7820E-05 | 4,0400E-05 | 2,37E-05 | 2,37E-05 | 5,39E-05 | 2,67E-05           |
| Cypermethrin               | Emission to air                 | kg         | -          | -          | -          | -          | 1,1300E-05 | 9,1700E-06 | 9,17E-06 | 9,17E-06 | 1,02E-05 | 1,51E-06           |
| Dimethomorph               | Emission to air                 | kg         | -          | -          | -          | -          | 7,3370E-05 | 6,0860E-05 | 6,09E-05 | 6,09E-05 | 6,71E-05 | 8,85E-06           |
| Dinitrogen monoxide        | Emission to air                 | kg         | 1,4000E-04 | 8,6424E-05 | 1,1000E-04 | 7,3756E-05 | 1,5000E-04 | 1,3000E-04 | 7,38E-05 | 7,38E-05 | 1,15E-04 | 3,04E-05           |
| Dinocap                    | Emission to air                 | kg         | 1,7330E-05 | -          | -          | -          | -          | -          | -        | -        | -        | -                  |
| Flazasulfuron              | Emission to soil                | kg         | -          | 3,7900E-03 | 1,5150E-05 | 5,9300E-06 | 8,0000E-04 | 1,6830E-05 | 5,93E-06 | 5,93E-06 | 9,26E-04 | 1,64E-03           |
| Folpet                     | Emission to soil                | kg         | 9,7000E-04 | 3,8000E-04 | 6,9000E-04 | 7,8000E-04 | 1,3000E-03 | 1,1800E-03 | 3,80E-04 | 3,80E-04 | 8,83E-04 | 3,38E-04           |
| Fosetyl-aluminum           | Emission to soil                | kg         | -          | -          | -          | -          | 6,1000E-04 | -          | -        | -        | -        | -                  |
| Glyphosate                 | Emission to soil                | kg         | 5,6000E-04 | 3,4000E-04 | 3,0000E-04 | 5,2000E-04 | 5,8000E-04 | 2,4000E-04 | 2,40E-04 | 2,40E-04 | 4,23E-04 | 1,47E-04           |
| Imidacloprid               | Emission to soil                | kg         | 8,6400E-06 | 1,5600E-06 | 4,0500E-06 | -          | -          | -          | 1,56E-06 | 1,56E-06 | 4,75E-06 | 3,59E-06           |
| Iprovalicarb               | Emission to soil                | kg         | -          | -          | -          | 4,6840E-05 | 9,5130E-05 | -          | 4,68E-05 | 4,68E-05 | 7,10E-05 | 3,41E-05           |
| Kresoxim-methyl            | Emission to air                 | kg         | -          | 4,3860E-05 | 2,3000E-04 | 4,4470E-05 | 7,0730E-05 | 3,8260E-05 | 3,83E-05 | 3,83E-05 | 8,55E-05 | 8,18E-05           |
| Lambda-cyhalotrin          | Emission to air                 | kg         | 1,4600E-06 | -          | -          | 7,4000E-07 | -          | -          | 7,40E-07 | 7,40E-07 | 1,10E-06 | 5,09E-07           |
| Mancozeb                   | Emission to soil                | kg         | -          | -          | 8,5000E-04 | 2,9000E-04 | 5,7000E-04 | -          | 2,90E-04 | 2,90E-04 | 5,70E-04 | 2,80E-04           |
| Metalaxil                  | Emission to soil                | kg         | 2,4000E-04 | 9,5090E-05 | 6,2580E-05 | 8,1620E-05 | 1,4330E-05 | 1,3000E-04 | 1,43E-05 | 1,43E-05 | 1,04E-04 | 7,68E-05           |
| Penconazole                | Emission to soil                | kg         | 4,8500E-06 | 1,5350E-05 | 7,9550E-05 | 1,5560E-05 | -          | 1,17800E-5 | 4,85E-06 | 4,85E-06 | 2,88E-05 | 3,42E-05           |
| Phosphate                  | Emission to water/ ground water | m2*a       | -          | -          | -          | 1,0559E-08 | -          | 8,4774E-08 | 1,06E-08 | 1,06E-08 | 4,77E-08 | 5,25E-08           |
| Phosphorous                | Emission to water/ river        | m2*a       | -          | -          | -          | 1,0559E-08 | -          | 3,0113E-07 | 1,06E-08 | 1,06E-08 | 1,56E-07 | 2,05E-07           |
| Quizalofop-p-ethyl         | Emission to soil                | kg         | -          | -          | -          | -          | -          | 5,0520E-05 | -        | -        | -        | -                  |
| Sulphur                    | Emission to soil                | kg         | 8,1500E-03 | 3,7900E-03 | 4,3600E-03 | 3,4900E-03 | 1,2970E-02 | 1,4330E-02 | 3,49E-03 | 3,49E-03 | 7,85E-03 | 4,82E-03           |
| Sulphur trioxide           | Emission to air                 | kg         | -          | -          | -          | 2,9640E-05 | -          | -          | -        | -        | -        | -                  |
| Tebuconazole               | Emission to soil                | m2*a       | -          | -          | -          | -          | 3,2640E-05 | 2,020E-05  | 2,02E-05 | 2,02E-05 | 2,64E-05 | 8,80E-06           |
| Trifloxystrobin            | Emission to soil                | m2*a       | -          | -          | -          | -          | 1,6320E-05 | 1,010E-05  | 1,01E-05 | 1,01E-05 | 1,32E-05 | 4,40E-06           |
